# Supplementary material for: Whole Genome Gene Expression Meta-Analysis of Inflammatory Bowel Disease Colon Mucosa Demonstrates Lack of Major Differences between Crohn's Disease and Ulcerative Colitis
Source: PubMed Central journal article supplement (PMC3572080; doi:10.1371/journal.pone.0056818), 2013-02-13
Supplement: pone.0056818.s007.pdf [file pone.0056818.s007.pdf]

**Supplementary Table 1: Full sample pool info.**

“NA” is given when time of first diagnosis is missing. Sample group abbreviations: UC – Ulcerative colitis, CD – Crohn’s disease, N – Normal control. Sex abbreviations: M – Male, F – Female. Sample area abbreviations: R - Rectum, S – Sigmoid colon, D – Descending colon, T – Transverse colon, H – Hepatic flexure, A – Ascending colon, C – Caecum. Medication abbreviations: 5-ASA – 5-aminosalicylic acid, S-ASA – Sulfasalazine. Sample names and info for all samples used in the final analysis of the data given in ArrayExpress E-MTAB-184.

| Sample Name | Sample Group | Age (years) | Sex | Sample Location | Time since first diagnosis (years) | Medication                       |
|-------------|--------------|-------------|-----|-----------------|------------------------------------|----------------------------------|
| 100 F       | UC           | 46          | M   | R               | 8                                  | 5-ASAS/S-ASA                     |
| 100 S       | UC           | 46          | M   | HF              | 8                                  | 5-ASAS/S-ASA                     |
| 103 F NY    | N            | 46          | F   | HF              | 0                                  |                                  |
| 104 F       | UC           | 35          | F   | HF              | 25                                 | 5-ASAS/S-ASA                     |
| 104 S       | UC           | 35          | F   | T               | 25                                 | 5-ASAS/S-ASA                     |
| 105 F NY    | N            | 71          | M   | HF              | NA                                 |                                  |
| 109 F       | N            | 69          | M   | HF              | 0                                  |                                  |
| 110 S       | UC           | 40          | M   | R               | 1                                  |                                  |
| 111 S       | UC           | 66          | F   | S               | 0.5                                |                                  |
| 112 F       | CD           | 29          | F   | HF              | 10                                 | Corticosteroids                  |
| 113 F       | UC           | 51          | M   | HF              | 7                                  | 5-ASAS/S-ASA                     |
| 115F_4      | N            | 51          | M   | HF              | 0                                  |                                  |
| 117 F       | UC           | 38          | M   | HF              | 27                                 |                                  |
| 117 S       | UC           | 38          | M   | R               | 27                                 |                                  |
| 118 F       | UC           | 29          | F   | R               | 6                                  |                                  |
| 119 S       | UC           | 27          | F   | A               | 0.5                                |                                  |
| 119 F       | CD           | 27          | F   | HF              | 0.5                                | Corticosteroids                  |
| 120 F       | CD           | 20          | M   | HF              | 1                                  | Corticosteroids                  |
| 120 S       | CD           | 20          | M   | D               | 1                                  | Corticosteroids                  |
| 122 S       | UC           | 47          | F   | S               | 15                                 | 5-ASAS/S-ASA                     |
| 123 S       | UC           | 36          | F   | S               | 5                                  | Corticosteroids                  |
| 124 S       | UC           | 21          | F   | D               | 0.5                                | 5-ASAS/S-ASA,<br>Corticosteroids |
| 125 F       | UC           | 55          | F   | HF              | 0                                  |                                  |
| 125 S       | UC           | 55          | F   | R               | 0                                  |                                  |
| 126 S       | UC           | 20          | M   | S               | 2                                  | 5-ASAS/S-ASA,<br>Corticosteroids |
| 127 F NY    | CD           | 38          | M   | HF              | 13                                 | 5-ASAS/S-ASA,<br>Corticosteroids |

|       |    |    |   |    |      |                                  |
|-------|----|----|---|----|------|----------------------------------|
| 128 F | CD | 55 | M | HF | 10   | 5-ASAS/S-ASA                     |
| 131 F | N  | 48 | F | HF | 10   |                                  |
| 132 S | UC | 22 | M | R  | 0.5  | 5-ASAS/S-ASA                     |
| 133 S | UC | 37 | F | S  | 10   |                                  |
| 134 S | CD | 36 | M | S  | 12   | 5-ASAS/S-ASA,<br>Corticosteroids |
| 137 F | N  | 57 | M | HF | NA   |                                  |
| 138 S | UC | 19 | M | HF | 0.5  | 5-ASAS/S-ASA                     |
| 140 F | N  | 68 | M | HF | NA   |                                  |
| 141 F | UC | 32 | M | HF | 7    | 5-ASAS/S-ASA                     |
| 143 F | N  | 35 | F | HF | NA   |                                  |
| 144 F | UC | 60 | F | HF | 25   | 5-ASAS/S-ASA                     |
| 146F  | UC | 69 | F | HF | NA   | 5-ASAS/S-ASA,<br>Corticosteroids |
| 148 S | UC | 42 | M | T  | 9    |                                  |
| 149 F | UC | 59 | F | HF | 13   | 5-ASAS/S-ASA                     |
| 149 S | UC | 59 | F | R  | 13   | 5-ASAS/S-ASA                     |
| 150 F | CD | 50 | F | HF | 18   |                                  |
| 151 S | UC | 48 | F | R  | 4    | 5-ASAS/S-ASA                     |
| 152 F | UC | 38 | F | HF | 3    | Corticosteroids                  |
| 152 S | UC | 38 | F | R  | 3    | Corticosteroids                  |
| 153 S | UC | 28 | F | S  | 6    | 5-ASAS/S-ASA,<br>Corticosteroids |
| 154 F | CD | 26 | M | HF | 0.25 |                                  |
| 154 S | CD | 26 | M | S  |      |                                  |
| 155 S | UC | 53 | M | S  | 16   | 5-ASAS/S-ASA,<br>Corticosteroids |
| 157 F | UC | 37 | F | R  | 8    |                                  |
| 157 S | UC | 37 | F | HF | 8    |                                  |
| 158 F | UC | 50 | M | HF | 8    | 5-ASAS/S-ASA                     |
| 159 F | UC | 34 | M | HF | 12   | 5-ASAS/S-ASA,<br>Corticosteroids |
| 160 F | UC | 27 | M | HF | 23   |                                  |
| 161 F | CD | 47 | M | HF | 6    |                                  |
| 163 F | UC | 21 | F | HF | 2    |                                  |
| 164 S | CD | 36 | M | C  | 7    |                                  |
| 165 F | UC | 39 | F | HF | 7    | 5-ASAS/S-ASA                     |
| 166 S | UC | 46 | F | R  | 21   | 5-ASAS/S-ASA                     |
| 168 F | UC | 57 | M | HF | 26   | 5-ASAS/S-ASA                     |

|          |    |    |   |    |      |                                  |
|----------|----|----|---|----|------|----------------------------------|
| 169 F    | CD | 22 | M | HF | 0.25 |                                  |
| 170 F    | UC | 59 | M | HF | 22   | 5-ASAS/S-ASA                     |
| 171 F    | UC | 49 | M | HF | 22   | 5-ASAS/S-ASA,<br>Corticosteroids |
| 171 S    | UC | 49 | M | S  | 22   | 5-ASAS/S-ASA,<br>Corticosteroids |
| 173 F NY | UC | 28 | F | HF | 8    | 5-ASAS/S-ASA                     |
| 173 S NY | UC | 28 | F | R  | 8    | 5-ASAS/S-ASA                     |
| 175 F    | UC | 49 | F | HF | 34   | 5-ASAS/S-ASA                     |
| 176 F    | UC | 31 | M | HF | 0    |                                  |
| 177 F    | CD | 55 | F | HF | 2    | Corticosteroids                  |
| 178 F    | UC | 44 | F | HF | 15   | 5-ASAS/S-ASA                     |
| 180 F    | UC | 44 | F | HF | 14   |                                  |
| 181 S    | UC | 72 | M | S  | 15   | 5-ASAS/S-ASA                     |
| 182 F    | CD | 40 | M | HF | 3    | 5-ASAS/S-ASA                     |
| 183 F    | UC | 49 | M | HF | 25   | 5-ASAS/S-ASA                     |
| 184 F    | UC | 46 | F | HF | 0    |                                  |
| 200 F NY | N  | 30 | F | HF | NA   |                                  |
| 201 F    | UC | 45 | M | HF | 12   | 5-ASAS/S-ASA                     |
| 202 F    | N  | 28 | M | HF | NA   |                                  |
| 203 F    | N  | 48 | F | HF | NA   |                                  |
| 205 F    | N  | 51 | M | HF | NA   |                                  |
| 206 F    | UC | 71 | F | HF | 17   |                                  |
| 208 F    | UC | 62 | F | HF | 25   |                                  |
| 209 F    | UC | 59 | F | HF | 40   | 5-ASAS/S-ASA                     |
| 209 S    | UC | 59 | F | S  | 40   | 5-ASAS/S-ASA                     |
| 210 F    | UC | 37 | M | HF | 19   |                                  |
| 210 S    | UC | 37 | M | R  | 19   |                                  |
| 211 F    | CD | 20 | F | HF | 0.5  |                                  |
| 212 F    | CD | 42 | M | HF | 17   | 5-ASAS/S-ASA                     |
| 212 S    | CD | 42 | M | S  | 17   | 5-ASAS/S-ASA                     |
| 214 F    | UC | 33 | F | HF | 2    |                                  |
| 214 S    | UC | 33 | F | R  | 2    |                                  |
| 215 F    | UC | 56 | M | HF | 4    | 5-ASAS/S-ASA                     |
| 216 F    | N  | 60 | M | HF | NA   |                                  |
| 217 F    | N  | 42 | M | HF | NA   |                                  |
| 218 F    | CD | 49 | M | HF | 28   |                                  |
| 219 F    | N  | 44 | F | HF | NA   |                                  |
| 222 F    | N  | 35 | M | HF | NA   |                                  |

|       |    |    |   |    |    |                                  |
|-------|----|----|---|----|----|----------------------------------|
| 223 F | N  | 31 | F | HF | NA |                                  |
| 225 F | UC | 42 | F | HF | 15 | 5-ASAS/S-ASA                     |
| 225 S | UC | 42 | F | S  | 15 | 5-ASAS/S-ASA                     |
| 227 S | UC | 25 | M | R  | 2  | 5-ASAS/S-ASA,<br>Corticosteroids |
| 228 F | UC | 55 | M | T  | 27 | 5-ASAS/S-ASA                     |
| 228 S | UC | 55 | M | A  | 27 | 5-ASAS/S-ASA                     |
| 229S  | CD | 31 | F | T  | 7  |                                  |
| 230 F | CD | 39 | M | HF | 25 | 5-ASAS/S-ASA,<br>Corticosteroids |
| 231 F | UC | 33 | F | HF | 4  |                                  |
| 233 F | UC | 59 | F | HF | 18 | 5-ASAS/S-ASA                     |
| 234 F | N  | 26 | F | HF | NA |                                  |
| 235 F | UC | 22 | M | HF | 1  | 5-ASAS/S-ASA                     |
| 235 S | UC | 22 | M | S  | 1  | 5-ASAS/S-ASA                     |
| 236 F | CD | 26 | M | HF | 8  |                                  |
| 239 S | UC | 31 | F | S  | 14 | 5-ASAS/S-ASA                     |
| 240 F | CD | 63 | M | HF | 6  | Corticosteroids                  |
| 241 F | UC | 30 | M | HF | 10 |                                  |
| 242 F | N  | 30 | M | HF | NA |                                  |
| 243 S | UC | 35 | M | R  | 15 | 5-ASAS/S-ASA,<br>Corticosteroids |
| 244 F | UC | 62 | M | HF | 19 | 5-ASAS/S-ASA                     |
| 245F  | CD | 44 | F | HF | 7  |                                  |
| 247F  | N  | 19 | F | HF | NA |                                  |
| 250 F | CD | 21 | M | HF | 5  | 5-ASAS/S-ASA,<br>Corticosteroids |
| 253 F | UC | 48 | F | HF | 17 |                                  |
| 254 S | UC | 64 | F | R  | 27 | 5-ASAS/S-ASA                     |
| 256 F | UC | 59 | F | HF | 20 | 5-ASAS/S-ASA                     |
| 257 S | UC | 29 | F | HF | 13 |                                  |
| 258 S | UC | 32 | M | HF | 20 | 5-ASA                            |
| 259 F | CD | 28 | F | HF | 6  |                                  |
| 259 S | CD | 28 | F | R  | 6  |                                  |

**Table 1: Sample information for all samples used in the final analysis. Where information on time of first diagnosis is missing, “NA” is given. Sample area is given as follows: R - Rectum, S – Sigmoid colon, D – Descending colon, T – Transverse colon, H – Hepatic flexure, A – Ascending colon, C – Caecum.**
