# Supplementary material for: Whole Genome Gene Expression Meta-Analysis of Inflammatory Bowel Disease Colon Mucosa Demonstrates Lack of Major Differences between Crohn's Disease and Ulcerative Colitis
Source: PLoS One. 2013 Feb 13;8(2):e56818. doi: 10.1371/journal.pone.0056818 (PMC3572080; doi:10.1371/journal.pone.0056818)
Supplement: Table S3 — csv – Comma separated values. Over-represented Gene Ontology terms in the Crohn’s disease-specific gene co-expression network. (CSV) [file pone.0056818.s009.csv]

module	modSize	bkgrModSize	rank	enrichmentP	BonferoniP	nModGenesInTerm	fracOfBkgrModSize	fracOfBkgrTermSize	bkgrTermSize	termID	termOntology	termName	termDefinition
CD.N.0	1121	1038	1	0.00102058403430778	1	10	0.00963391136801541	0.714285714285714	14	GO:0006778	BP	porphyrin-containing compound metabolic process	The chemical reactions and pathways involving any member of a large group of derivatives or analogs of porphyrin. Porphyrins consists of a ring of four pyrrole nuclei linked each to the next at their alpha positions through a methine group.
CD.N.0	1121	1038	2	0.00102058403430778	1	10	0.00963391136801541	0.714285714285714	14	GO:0033013	BP	tetrapyrrole metabolic process	The chemical reactions and pathways involving tetrapyrroles, natural pigments containing four pyrrole rings joined by one-carbon units linking position 2 of one pyrrole ring to position 5 of the next.
CD.N.0	1121	1038	3	0.00171493081970759	1	787	0.758188824662813	0.297655068078669	2644	GO:0005622	CC	intracellular	The living contents of a cell; the matter contained within (but not including) the plasma membrane, usually taken to exclude large vacuoles and masses of secretory or ingested material. In eukaryotes it includes the nucleus and cytoplasm.
CD.N.0	1121	1038	4	0.00176878732174132	1	165	0.158959537572254	0.341614906832298	483	GO:0003676	MF	nucleic acid binding	Interacting selectively and non-covalently with any nucleic acid.
CD.N.0	1121	1038	5	0.00213631679902609	1	18	0.0173410404624277	0.529411764705882	34	GO:0004518	MF	nuclease activity	Catalysis of the hydrolysis of ester linkages within nucleic acids.
CD.N.0	1121	1038	6	0.00245827809365217	1	50	0.0481695568400771	0.403225806451613	124	GO:0003723	MF	RNA binding	Interacting selectively and non-covalently with an RNA molecule or a portion thereof.
CD.N.0	1121	1038	7	0.00261858047684624	1	9	0.00867052023121387	0.692307692307692	13	GO:0046930	CC	pore complex	Any small opening in a membrane that allows the passage of gases and/or liquids.
CD.N.0	1121	1038	8	0.00275778867859938	1	6	0.00578034682080925	0.857142857142857	7	GO:0031929	BP	TOR signaling cascade	A series of molecular signals mediated by TOR (Target of rapamycin) proteins, members of the phosphoinositide (PI) 3-kinase related kinase (PIKK) family that act as serine/threonine kinases in response to nutrient availability or growth factors.
CD.N.0	1121	1038	9	0.00275778867859938	1	6	0.00578034682080925	0.857142857142857	7	GO:0032006	BP	regulation of TOR signaling cascade	Any process that modulates the frequency, rate or extent of signaling via the TOR signaling pathway.
CD.N.0	1121	1038	10	0.00289406872029263	1	8	0.00770712909441233	0.727272727272727	11	GO:0004527	MF	exonuclease activity	Catalysis of the hydrolysis of ester linkages within nucleic acids by removing nucleotide residues from the 3' or 5' end.
CD.N.1	577	552	1	4.07618382796724e-05	0.507281077390523	10	0.0181159420289855	0.588235294117647	17	GO:0008009	MF	chemokine activity	The function of a family of chemotactic pro-inflammatory activation-inducible cytokines acting primarily upon hemopoietic cells in immunoregulatory processes; all chemokines possess a number of conserved cysteine residues involved in intramolecular disulfide bond formation.
CD.N.1	577	552	2	0.000115687335617468	1	71	0.128623188405797	0.227564102564103	312	GO:0044421	CC	extracellular region part	Any constituent part of the extracellular region, the space external to the outermost structure of a cell. For cells without external protective or external encapsulating structures this refers to space outside of the plasma membrane. This term covers constituent parts of the host cell environment outside an intracellular parasite.
CD.N.1	577	552	3	0.000174372509624862	1	57	0.103260869565217	0.2375	240	GO:0005615	CC	extracellular space	That part of a multicellular organism outside the cells proper, usually taken to be outside the plasma membranes, and occupied by fluid.
CD.N.1	577	552	4	0.000379257247588413	1	17	0.0307971014492754	0.354166666666667	48	GO:0030424	CC	axon	The long process of a neuron that conducts nerve impulses, usually away from the cell body to the terminals and varicosities, which are sites of storage and release of neurotransmitter.
CD.N.1	577	552	5	0.000416049876892072	1	10	0.0181159420289855	0.476190476190476	21	GO:0042379	MF	chemokine receptor binding	Interacting selectively and non-covalently with any chemokine receptor.
CD.N.1	577	552	6	0.000500237304365792	1	11	0.0199275362318841	0.44	25	GO:0007260	BP	tyrosine phosphorylation of STAT protein	The process of introducing a phosphate group to a tyrosine residue of a STAT (Signal Transducer and Activator of Transcription) protein.
CD.N.1	577	552	7	0.000516018050276941	1	4	0.0072463768115942	1	4	GO:0004065	MF	arylsulfatase activity	Catalysis of the reaction: a phenol sulfate + H2O = a phenol + sulfate.
CD.N.1	577	552	8	0.000942558763746256	1	79	0.143115942028986	0.20844327176781	379	GO:0008283	BP	cell proliferation	The multiplication or reproduction of cells, resulting in the expansion of a cell population.
CD.N.1	577	552	9	0.000998539177447858	1	15	0.0271739130434783	0.348837209302326	43	GO:0007259	BP	JAK-STAT cascade	Any process in which STAT proteins (Signal Transducers and Activators of Transcription) and JAK (Janus Activated Kinase) proteins convey a signal to trigger a change in the activity or state of a cell. The JAK-STAT cascade begins with activation of STAT proteins by members of the JAK family of tyrosine kinases, proceeds through dimerization and subsequent nuclear translocation of STAT proteins, a…
CD.N.1	577	552	10	0.00101240256539629	1	114	0.206521739130435	0.194871794871795	585	GO:0016787	MF	hydrolase activity	Catalysis of the hydrolysis of various bonds, e.g. C-O, C-N, C-C, phosphoric anhydride bonds, etc. Hydrolase is the systematic name for any enzyme of EC class 3.
CD.N.10	106	103	1	3.63941943790123e-06	0.0452925749046808	5	0.0485436893203883	0.5	10	GO:0001659	BP	temperature homeostasis	A homeostatic process in which an organism modulates its internal body temperature.
CD.N.10	106	103	2	6.45259174428982e-06	0.0803025042576868	18	0.174757281553398	0.0913705583756345	197	GO:0048878	BP	chemical homeostasis	Any biological process involved in the maintenance of an internal steady state of a chemical.
CD.N.10	106	103	3	3.48336652919281e-05	0.433504964558045	21	0.203883495145631	0.0729166666666667	288	GO:0042592	BP	homeostatic process	Any biological process involved in the maintenance of an internal steady state.
CD.N.10	106	103	4	4.62994303729066e-05	0.576196410990823	9	0.087378640776699	0.145161290322581	62	GO:0014070	BP	response to organic cyclic compound	Any process that results in a change in state or activity of a cell or an organism (in terms of movement, secretion, enzyme production, gene expression, etc.) as a result of an organic cyclic compound stimulus.
CD.N.10	106	103	5	7.932193300817e-05	0.987161456286676	6	0.058252427184466	0.222222222222222	27	GO:0042594	BP	response to starvation	Any process that results in a change in state or activity of a cell or an organism (in terms of movement, secretion, enzyme production, gene expression, etc.) as a result of a starvation stimulus, deprivation of nourishment.
CD.N.10	106	103	6	9.77067118283292e-05	1	9	0.087378640776699	0.132352941176471	68	GO:0032496	BP	response to lipopolysaccharide	Any process that results in a change in state or activity of an organism (in terms of movement, secretion, enzyme production, gene expression, etc.) as a result of a lipopolysaccharide stimulus; lipopolysaccharide is a major component of the cell wall of gram-negative bacteria.
CD.N.10	106	103	7	0.000109507418077044	1	11	0.106796116504854	0.107843137254902	102	GO:0031667	BP	response to nutrient levels	Any process that results in a change in state or activity of a cell or an organism (in terms of movement, secretion, enzyme production, gene expression, etc.) as a result of a stimulus reflecting the presence, absence, or concentration of nutrients.
CD.N.10	106	103	8	0.000148543869387801	1	6	0.058252427184466	0.2	30	GO:0009266	BP	response to temperature stimulus	Any process that results in a change in state or activity of a cell or an organism (in terms of movement, secretion, enzyme production, gene expression, etc.) as a result of a temperature stimulus.
CD.N.10	106	103	9	0.000152041108557299	1	14	0.135922330097087	0.0858895705521472	163	GO:0019725	BP	cellular homeostasis	Any process involved in the maintenance of an internal steady state at the level of the cell.
CD.N.10	106	103	10	0.000178725703290189	1	5	0.0485436893203883	0.25	20	GO:0006953	BP	acute-phase response	An acute inflammatory response that involves non-antibody proteins whose concentrations in the plasma increase in response to infection or injury of homeothermic animals.
CD.N.11	49	46	1	5.04378873800857e-05	0.627699508445167	23	0.5	0.0274135876042908	839	GO:0046872	MF	metal ion binding	Interacting selectively and non-covalently with any metal ion.
CD.N.11	49	46	2	6.40676814702098e-05	0.797322295896761	23	0.5	0.027027027027027	851	GO:0043169	MF	cation binding	Interacting selectively and non-covalently with cations, charged atoms or groups of atoms with a net positive charge.
CD.N.11	49	46	3	7.06766321089331e-05	0.879570686595673	23	0.5	0.0268691588785047	856	GO:0043167	MF	ion binding	Interacting selectively and non-covalently with ions, charged atoms or groups of atoms.
CD.N.11	49	46	4	0.000136794637750902	1	15	0.326086956521739	0.0350467289719626	428	GO:0046914	MF	transition metal ion binding	Interacting selectively and non-covalently with a transition metal ions; a transition metal is an element whose atom has an incomplete d-subshell of extranuclear electrons, or which gives rise to a cation or cations with an incomplete d-subshell. Transition metals often have more than one valency state. Biologically relevant transition metals include vanadium, manganese, iron, copper, cobalt, nic…
CD.N.11	49	46	5	0.000155078692322526	1	2	0.0434782608695652	1	2	GO:0009650	BP	UV protection	Any process in which an organism or cell protects itself from ultraviolet radiation (UV), which may also result in resistance to repeated exposure to UV.
CD.N.11	49	46	6	0.000878180903617073	1	12	0.260869565217391	0.0345821325648415	347	GO:0008270	MF	zinc ion binding	Interacting selectively and non-covalently with zinc (Zn) ions.
CD.N.11	49	46	7	0.00123613630280003	1	18	0.391304347826087	0.0257142857142857	700	GO:0010467	BP	gene expression	The process in which a gene's sequence is converted into a mature gene product or products (proteins or RNA). This includes the production of an RNA transcript as well as any processing to produce a mature RNA product or an mRNA (for protein-coding genes) and the translation of that mRNA into protein. Some protein processing events may be included when they are required to form an active form of …
CD.N.11	49	46	8	0.00151374763283381	1	2	0.0434782608695652	0.4	5	GO:0006465	BP	signal peptide processing	The proteolytic removal of a signal peptide from a protein during or after transport to a specific location in the cell.
CD.N.11	49	46	9	0.00151374763283381	1	2	0.0434782608695652	0.4	5	GO:0071479	BP	cellular response to ionizing radiation	Any process that results in a change in state or activity of a cell (in terms of movement, secretion, enzyme production, gene expression, etc.) as a result of a ionizing radiation stimulus. Ionizing radiation is radiation with sufficient energy to remove electrons from atoms and may arise from spontaneous decay of unstable isotopes, resulting in alpha and beta particles and gamma rays. Ionizing r…
CD.N.11	49	46	10	0.00173546235067703	1	18	0.391304347826087	0.025	720	GO:0009059	BP	macromolecule biosynthetic process	The chemical reactions and pathways resulting in the formation of a macromolecule, any molecule of high relative molecular mass, the structure of which essentially comprises the multiple repetition of units derived, actually or conceptually, from molecules of low relative molecular mass.
CD.N.12	29	28	1	4.03223801171957e-07	0.005018120205585	3	0.107142857142857	1	3	GO:0048535	BP	lymph node development	The process whose specific outcome is the progression of lymph nodes over time, from their formation to the mature structure. A lymph node is a round, oval, or bean shaped structure localized in clusters along the lymphatic vessels, with a distinct internal structure including specialized vasculature and B- and T-zones for the activation of lymphocytes.
CD.N.12	29	28	2	5.23172912801822e-06	0.0651088689981868	12	0.428571428571429	0.0331491712707182	362	GO:0006955	BP	immune response	Any immune system process that functions in the calibrated response of an organism to a potential internal or invasive threat.
CD.N.12	29	28	3	9.53247375070141e-06	0.118631635827479	14	0.5	0.0262172284644195	534	GO:0002376	BP	immune system process	Any process involved in the development or functioning of the immune system, an organismal system for calibrated responses to potential internal or invasive threats.
CD.N.12	29	28	4	0.000137380512250494	1	4	0.142857142857143	0.111111111111111	36	GO:0006959	BP	humoral immune response	An immune response mediated through a body fluid.
CD.N.12	29	28	5	0.000717437002281494	1	6	0.214285714285714	0.0405405405405405	148	GO:0046649	BP	lymphocyte activation	A change in morphology and behavior of a lymphocyte resulting from exposure to a specific antigen, mitogen, cytokine, chemokine, cellular ligand, or soluble factor.
CD.N.12	29	28	6	0.0007827060548902	1	8	0.285714285714286	0.0289855072463768	276	GO:0002682	BP	regulation of immune system process	Any process that modulates the frequency, rate, or extent of an immune system process.
CD.N.12	29	28	7	0.00154126289694817	1	2	0.0714285714285714	0.25	8	GO:0002920	BP	regulation of humoral immune response	Any process that modulates the frequency, rate, or extent of a humoral immune response.
CD.N.12	29	28	8	0.00160440371175853	1	4	0.142857142857143	0.0588235294117647	68	GO:0009897	CC	external side of plasma membrane	The side of the plasma membrane that is opposite to the side that faces the cytoplasm.
CD.N.12	29	28	9	0.00194107973676948	1	6	0.214285714285714	0.0335195530726257	179	GO:0045321	BP	leukocyte activation	A change in morphology and behavior of a leukocyte resulting from exposure to a specific antigen, mitogen, cytokine, cellular ligand, or soluble factor.
CD.N.12	29	28	10	0.00197224065277262	1	2	0.0714285714285714	0.222222222222222	9	GO:0005164	MF	tumor necrosis factor receptor binding	Interacting selectively and non-covalently with the tumor necrosis factor receptor.
CD.N.13	23	22	1	0.00186847698358639	1	3	0.136363636363636	0.0714285714285714	42	GO:0030414	MF	peptidase inhibitor activity	Stops, prevents or reduces the activity of a peptidase, any enzyme that catalyzes the hydrolysis peptide bonds.
CD.N.13	23	22	2	0.0039464181212493	1	2	0.0909090909090909	0.125	16	GO:0007588	BP	excretion	The elimination by an organism of the waste products that arise as a result of metabolic activity. These products include water, carbon dioxide (CO2), and nitrogenous compounds.
CD.N.13	23	22	3	0.00429504242774927	1	5	0.227272727272727	0.0267379679144385	187	GO:0006163	BP	purine nucleotide metabolic process	The chemical reactions and pathways involving a purine nucleotide, a compound consisting of nucleoside (a purine base linked to a deoxyribose or ribose sugar) esterified with a phosphate group at either the 3' or 5'-hydroxyl group of the sugar.
CD.N.13	23	22	4	0.0049951459482106	1	2	0.0909090909090909	0.111111111111111	18	GO:0005254	MF	chloride channel activity	Catalysis of facilitated diffusion of a chloride (by an energy-independent process) involving passage through a transmembrane aqueous pore or channel without evidence for a carrier-mediated mechanism.
CD.N.13	23	22	5	0.00602079912424736	1	1	0.0454545454545455	1	1	GO:0002023	BP	reduction of food intake in response to dietary excess	The specific actions of an organism that are triggered by the detection of dietary excess and result in a decreased intake of food.
CD.N.13	23	22	6	0.00602079912424736	1	1	0.0454545454545455	1	1	GO:0010949	BP	negative regulation of intestinal phytosterol absorption	Any process that stops, prevents, or reduces the frequency, rate or extent of the directed movement of phytosterols into the blood by absorption from the small intestine.
CD.N.13	23	22	7	0.00602079912424736	1	1	0.0454545454545455	1	1	GO:0030300	BP	regulation of intestinal cholesterol absorption	Any process that modulates the frequency, rate or extent of absorption of cholesterol into the blood, and the exclusion of other sterols from absorption.
CD.N.13	23	22	8	0.00602079912424736	1	1	0.0454545454545455	1	1	GO:0043006	BP	activation of phospholipase A2 activity by calcium-mediated signaling	A series of molecular signals that leads to the upregulation of calcium-dependent phospholipase A2 activity in response to the signal.
CD.N.13	23	22	9	0.00602079912424736	1	1	0.0454545454545455	1	1	GO:0045796	BP	negative regulation of intestinal cholesterol absorption	Any process that stops, prevents, or reduces the frequency, rate or extent of uptake of cholesterol into the blood by absorption from the intestine.
CD.N.13	23	22	10	0.00602079912424736	1	1	0.0454545454545455	1	1	GO:0016589	CC	NURF complex	A four subunit ISWI-containing protein complex that facilitates nucleosome mobility and transcriptional activation in an ATP-dependent manner. In contrast to other chromatin remodeling complexes, the ATPase activity of NURF requires nucleosomes rather than free DNA or histones.
CD.N.2	354	344	1	1.60056715125093e-05	0.199190581973178	13	0.0377906976744186	0.351351351351351	37	GO:0034340	BP	response to type I interferon	Any process that results in a change in state or activity of a cell or an organism (in terms of movement, secretion, enzyme production, gene expression, etc.) as a result of a type I interferon stimulus. Type I interferons include the interferon-alpha, beta, delta, episilon, zeta, kappa, tau, and omega gene families.
CD.N.2	354	344	2	1.60056715125093e-05	0.199190581973178	13	0.0377906976744186	0.351351351351351	37	GO:0060337	BP	type I interferon-mediated signaling pathway	A series of molecular signals initiated by the binding of a type I interferon binding to a receptor on the surface of a cell, and ending with regulation of a downstream cellular process, e.g. transcription. Type I interferons include the interferon-alpha, beta, delta, episilon, zeta, kappa, tau, and omega gene families.
CD.N.2	354	344	3	1.60056715125093e-05	0.199190581973178	13	0.0377906976744186	0.351351351351351	37	GO:0071357	BP	cellular response to type I interferon	Any process that results in a change in state or activity of a cell (in terms of movement, secretion, enzyme production, gene expression, etc.) as a result of a type I interferon stimulus. Type I interferons include the interferon-alpha, beta, delta, episilon, zeta, kappa, tau, and omega gene families.
CD.N.2	354	344	4	0.000316883008460305	1	5	0.0145348837209302	0.625	8	GO:0042612	CC	MHC class I protein complex	A transmembrane protein complex composed of a MHC class I alpha chain and an invariant beta2-microglobin chain, and with or without a bound peptide antigen. Class I here refers to classical class I molecules.
CD.N.2	354	344	5	0.000318386085606276	1	73	0.212209302325581	0.136704119850187	534	GO:0002376	BP	immune system process	Any process involved in the development or functioning of the immune system, an organismal system for calibrated responses to potential internal or invasive threats.
CD.N.2	354	344	6	0.000323771408441256	1	26	0.0755813953488372	0.18978102189781	137	GO:0071345	BP	cellular response to cytokine stimulus	Any process that results in a change in state or activity of a cell (in terms of movement, secretion, enzyme production, gene expression, etc.) as a result of a cytokine stimulus.
CD.N.2	354	344	7	0.000357774197073077	1	4	0.0116279069767442	0.8	5	GO:0043401	BP	steroid hormone mediated signaling pathway	A series of molecular signals mediated by a steroid hormone binding to a receptor.
CD.N.2	354	344	8	0.000615395934844023	1	10	0.0290697674418605	0.303030303030303	33	GO:0045444	BP	fat cell differentiation	The process in which a relatively unspecialized cell acquires specialized features of an adipocyte, an animal connective tissue cell specialized for the synthesis and storage of fat.
CD.N.2	354	344	9	0.00159829110393049	1	6	0.0174418604651163	0.4	15	GO:0070664	BP	negative regulation of leukocyte proliferation	Any process that stops, prevents, or reduces the frequency, rate or extent of leukocyte proliferation.
CD.N.2	354	344	10	0.00214669896693332	1	4	0.0116279069767442	0.571428571428571	7	GO:0043124	BP	negative regulation of I-kappaB kinase/NF-kappaB cascade	Any process that stops, prevents, or reduces the frequency, rate or extent of an I-kappaB kinase/NF-kappaB induced cascade.
CD.N.3	352	344	1	2.64444276665968e-10	3.29100902310797e-06	36	0.104651162790698	0.288	125	GO:0031012	CC	extracellular matrix	A structure lying external to one or more cells, which provides structural support for cells or tissues; may be completely external to the cell (as in animals) or be part of the cell (as in plants).
CD.N.3	352	344	2	1.14717638299105e-07	0.00142766100863236	28	0.0813953488372093	0.271844660194175	103	GO:0005578	CC	proteinaceous extracellular matrix	A layer consisting mainly of proteins (especially collagen) and glycosaminoglycans (mostly as proteoglycans) that forms a sheet underlying or overlying cells such as endothelial and epithelial cells. The proteins are secreted by cells in the vicinity. An example of this component is found in Mus musculus.
CD.N.3	352	344	3	9.81813647645519e-07	0.0122186708449485	34	0.0988372093023256	0.222222222222222	153	GO:0048666	BP	neuron development	The process whose specific outcome is the progression of a neuron over time, from initial commitment of the cell to a specific fate, to the fully functional differentiated cell.
CD.N.3	352	344	4	1.21041446532538e-06	0.0150636080209744	18	0.0523255813953488	0.327272727272727	55	GO:0044420	CC	extracellular matrix part	Any constituent part of the extracellular matrix, the structure lying external to one or more cells, which provides structural support for cells or tissues; may be completely external to the cell (as in animals) or be part of the cell (as often seen in plants).
CD.N.3	352	344	5	1.65757567575429e-06	0.0206285292847621	28	0.0813953488372093	0.241379310344828	116	GO:0048812	BP	neuron projection morphogenesis	The process in which the anatomical structures of a neuron projection are generated and organized. A neuron projection is any process extending from a neural cell, such as axons or dendrites.
CD.N.3	352	344	6	1.92495549996314e-06	0.0239560711970413	52	0.151162790697674	0.178694158075601	291	GO:0048468	BP	cell development	The process whose specific outcome is the progression of the cell over time, from its formation to the mature structure. Cell development does not include the steps involved in committing a cell to a specific fate.
CD.N.3	352	344	7	2.80800117557019e-06	0.0349455746299711	31	0.0901162790697674	0.223021582733813	139	GO:0031175	BP	neuron projection development	The process whose specific outcome is the progression of a neuron projection over time, from its formation to the mature structure. A neuron projection is any process extending from a neural cell, such as axons or dendrites (collectively called neurites).
CD.N.3	352	344	8	4.31166460263831e-06	0.0536586659798338	6	0.0174418604651163	0.857142857142857	7	GO:0005583	CC	fibrillar collagen	Any collagen polymer in which collagen triple helices associate to form fibrils.
CD.N.3	352	344	9	4.31166460263831e-06	0.0536586659798338	6	0.0174418604651163	0.857142857142857	7	GO:0048407	MF	platelet-derived growth factor binding	Interacting selectively and non-covalently with platelet-derived growth factor.
CD.N.3	352	344	10	4.53697456121902e-06	0.0564626484143707	27	0.0784883720930233	0.234782608695652	115	GO:0048667	BP	cell morphogenesis involved in neuron differentiation	The process in which the structures of a neuron are generated and organized. This process occurs while the initially relatively unspecialized cell is acquiring the specialized features of a neuron.
CD.N.4	299	286	1	5.47896926449929e-05	0.681857724966937	12	0.041958041958042	0.285714285714286	42	GO:0006986	BP	response to unfolded protein	Any process that results in a change in state or activity of a cell or an organism (in terms of movement, secretion, enzyme production, gene expression, etc.) as a result of an unfolded protein stimulus.
CD.N.4	299	286	2	0.000232041779645988	1	10	0.034965034965035	0.285714285714286	35	GO:0034976	BP	response to endoplasmic reticulum stress	Any process that results in a change in state or activity of a cell (in terms of movement, secretion, enzyme production, gene expression, etc.) as a result of a stimulus indicating endoplasmic reticulum (ER) stress. ER stress usually results from the accumulation of unfolded or misfolded proteins in the ER lumen.
CD.N.4	299	286	3	0.000232041779645988	1	10	0.034965034965035	0.285714285714286	35	GO:0035967	BP	cellular response to topologically incorrect protein	Any process that results in a change in state or activity of a cell (in terms of movement, secretion, enzyme production, gene expression, etc.) as a result of a protein that is not folded in its correct three-dimensional structure.
CD.N.4	299	286	4	0.000275027617101499	1	5	0.0174825174825175	0.555555555555556	9	GO:0033116	CC	endoplasmic reticulum-Golgi intermediate compartment membrane	The lipid bilayer surrounding any of the compartments of the endoplasmic reticulum (ER)-Golgi intermediate compartment system.
CD.N.4	299	286	5	0.000370466971001267	1	7	0.0244755244755245	0.368421052631579	19	GO:0005793	CC	endoplasmic reticulum-Golgi intermediate compartment	A complex system of membrane-bounded compartments located between endoplasmic reticulum (ER) and the Golgi complex, with a distinctive membrane protein composition; involved in ER-to-Golgi transport.
CD.N.4	299	286	6	0.000382512841572419	1	6	0.020979020979021	0.428571428571429	14	GO:0000502	CC	proteasome complex	A large multisubunit complex which catalyzes protein degradation. This complex consists of the barrel shaped proteasome core complex and one or two associated proteins or complexes that act in regulating entry into or exit from the core.
CD.N.4	299	286	7	0.000411410896912008	1	17	0.0594405594405594	0.191011235955056	89	GO:0030659	CC	cytoplasmic vesicle membrane	The lipid bilayer surrounding a cytoplasmic vesicle.
CD.N.4	299	286	8	0.000474876030602434	1	3	0.0104895104895105	1	3	GO:0005797	CC	Golgi medial cisterna	The middle Golgi cisterna (or cisternae).
CD.N.4	299	286	9	0.00051500668042666	1	5	0.0174825174825175	0.5	10	GO:0030660	CC	Golgi-associated vesicle membrane	The lipid bilayer surrounding a vesicle associated with the Golgi apparatus.
CD.N.4	299	286	10	0.000701793050036833	1	17	0.0594405594405594	0.182795698924731	93	GO:0012506	CC	vesicle membrane	The lipid bilayer surrounding any membrane-bounded vesicle in the cell.
CD.N.5	280	264	1	0.000783328868908613	1	4	0.0151515151515152	0.571428571428571	7	GO:0043966	BP	histone H3 acetylation	The modification of histone H3 by the addition of an acetyl group.
CD.N.5	280	264	2	0.00251022140455729	1	4	0.0151515151515152	0.444444444444444	9	GO:0050434	BP	positive regulation of viral transcription	Any process that activates or increases the frequency, rate or extent of viral transcription.
CD.N.5	280	264	3	0.00311594100212782	1	5	0.0189393939393939	0.333333333333333	15	GO:0019083	BP	viral transcription	The mechanisms involved in viral gene transcription, especially referring to those with temporal properties unique to viral transcription.
CD.N.5	280	264	4	0.00372100496568623	1	7	0.0265151515151515	0.241379310344828	29	GO:0003735	MF	structural constituent of ribosome	The action of a molecule that contributes to the structural integrity of the ribosome.
CD.N.5	280	264	5	0.00394810562396674	1	4	0.0151515151515152	0.4	10	GO:0046782	BP	regulation of viral transcription	Any process that modulates the frequency, rate or extent of the transcription of the viral genome.
CD.N.5	280	264	6	0.00426869558637654	1	5	0.0189393939393939	0.3125	16	GO:0016573	BP	histone acetylation	The modification of a histone by the addition of an acetyl group.
CD.N.5	280	264	7	0.00520165399291672	1	2	0.00757575757575758	1	2	GO:0070242	BP	thymocyte apoptosis	The process of apoptosis in a thymocyte.
CD.N.5	280	264	8	0.00520165399291672	1	2	0.00757575757575758	1	2	GO:0019815	CC	B cell receptor complex	An immunoglobulin complex that is present in the plasma membrane of B cells and that in its canonical form is composed of two identical immunoglobulin heavy chains and two identical immunoglobulin light chains and a signaling subunit, a heterodimer of the Ig-alpha and Ig-beta proteins.
CD.N.5	280	264	9	0.00520165399291672	1	2	0.00757575757575758	1	2	GO:0044295	CC	axonal growth cone	The migrating motile tip of a growing nerve cell axon.
CD.N.5	280	264	10	0.00520165399291672	1	2	0.00757575757575758	1	2	GO:0005388	MF	calcium-transporting ATPase activity	Catalysis of the transfer of a solute or solutes from one side of a membrane to the other according to the reaction: ATP + H2O + Ca2+(cis) = ADP + phosphate + Ca2+(trans).
CD.N.6	239	231	1	0.000134412385370697	1	28	0.121212121212121	0.130841121495327	214	GO:0005789	CC	endoplasmic reticulum membrane	The lipid bilayer surrounding the endoplasmic reticulum.
CD.N.6	239	231	2	0.000145933601371492	1	28	0.121212121212121	0.130232558139535	215	GO:0042175	CC	nuclear outer membrane-endoplasmic reticulum membrane network	The continuous network of membranes encompassing the nuclear outer membrane and the endoplasmic reticulum membrane.
CD.N.6	239	231	3	0.000303701202791884	1	8	0.0346320346320346	0.275862068965517	29	GO:0006612	BP	protein targeting to membrane	The process of directing proteins towards a membrane, usually using signals contained within the protein.
CD.N.6	239	231	4	0.000951598429213617	1	3	0.012987012987013	0.75	4	GO:0016255	BP	attachment of GPI anchor to protein	A transamidation reaction that results in the cleavage of the polypeptide chain and the concomitant transfer of the GPI anchor to the newly formed carboxy-terminal amino acid of the anchored protein. The cleaved C-terminal contains the C-terminal GPI signal sequence of the newly synthesized polypeptide chain.
CD.N.6	239	231	5	0.00120776340905652	1	5	0.0216450216450216	0.357142857142857	14	GO:0006888	BP	ER to Golgi vesicle-mediated transport	The directed movement of substances from the endoplasmic reticulum (ER) to the Golgi, mediated by COP II vesicles. Small COP II coated vesicles form from the ER and then fuse directly with the cis-Golgi. Larger structures are transported along microtubules to the cis-Golgi.
CD.N.6	239	231	6	0.00128499573222866	1	104	0.45021645021645	0.0801850424055513	1297	GO:0044446	CC	intracellular organelle part	A constituent part of an intracellular organelle, an organized structure of distinctive morphology and function, occurring within the cell. Includes constituent parts of the nucleus, mitochondria, plastids, vacuoles, vesicles, ribosomes and the cytoskeleton but excludes the plasma membrane.
CD.N.6	239	231	7	0.00138630236002988	1	7	0.0303030303030303	0.25	28	GO:0006987	BP	activation of signaling protein activity involved in unfolded protein response	The conversion of a specific protein, possessing protein kinase and endoribonuclease activities, to an active form as a result of signaling via the unfolded protein response.
CD.N.6	239	231	8	0.00138630236002988	1	7	0.0303030303030303	0.25	28	GO:0032075	BP	positive regulation of nuclease activity	Any process that activates or increases the frequency, rate or extent of nuclease activity, the hydrolysis of ester linkages within nucleic acids.
CD.N.6	239	231	9	0.0019753621582435	1	43	0.186147186147186	0.0972850678733032	442	GO:0012505	CC	endomembrane system	A collection of membranous structures involved in transport within the cell. The main components of the endomembrane system are endoplasmic reticulum, Golgi bodies, vesicles, cell membrane and nuclear envelope. Members of the endomembrane system pass materials through each other or though the use of vesicles.
CD.N.6	239	231	10	0.002267913250917	1	3	0.012987012987013	0.6	5	GO:0048745	BP	smooth muscle tissue development	The process whose specific outcome is the progression of smooth muscle over time, from its formation to the mature structure.
CD.N.7	170	163	1	2.47589223551406e-17	3.08124788709725e-13	35	0.214723926380368	0.236486486486486	148	GO:0046649	BP	lymphocyte activation	A change in morphology and behavior of a lymphocyte resulting from exposure to a specific antigen, mitogen, cytokine, chemokine, cellular ligand, or soluble factor.
CD.N.7	170	163	2	2.15417146233046e-15	2.68086638487026e-11	36	0.220858895705521	0.201117318435754	179	GO:0045321	BP	leukocyte activation	A change in morphology and behavior of a leukocyte resulting from exposure to a specific antigen, mitogen, cytokine, cellular ligand, or soluble factor.
CD.N.7	170	163	3	1.59896915620412e-13	1.98991711489603e-09	26	0.159509202453988	0.247619047619048	105	GO:0042110	BP	T cell activation	The change in morphology and behavior of a mature or immature T cell resulting from exposure to a mitogen, cytokine, chemokine, cellular ligand, or an antigen for which it is specific.
CD.N.7	170	163	4	2.07956129357583e-13	2.58801402985512e-09	42	0.257668711656442	0.152173913043478	276	GO:0002682	BP	regulation of immune system process	Any process that modulates the frequency, rate, or extent of an immune system process.
CD.N.7	170	163	5	2.75697844035053e-13	3.43105966901623e-09	39	0.239263803680982	0.161157024793388	242	GO:0001775	BP	cell activation	A change in the morphology or behavior of a cell resulting from exposure to an activating factor such as a cellular or soluble ligand.
CD.N.7	170	163	6	1.05244886085517e-12	1.30977260733426e-08	34	0.208588957055215	0.175257731958763	194	GO:0002684	BP	positive regulation of immune system process	Any process that activates or increases the frequency, rate, or extent of an immune system process.
CD.N.7	170	163	7	2.04993377396806e-12	2.55114258170325e-08	25	0.153374233128834	0.233644859813084	107	GO:0051249	BP	regulation of lymphocyte activation	Any process that modulates the frequency, rate or extent of lymphocyte activation.
CD.N.7	170	163	8	4.64967599725042e-12	5.78652177857815e-08	18	0.110429447852761	0.333333333333333	54	GO:0050851	BP	antigen receptor-mediated signaling pathway	A series of molecular signals initiated by the cross-linking of an antigen receptor on a B or T cell.
CD.N.7	170	163	9	6.04910540464728e-12	7.52811167608354e-08	27	0.165644171779141	0.206106870229008	131	GO:0050778	BP	positive regulation of immune response	Any process that activates or increases the frequency, rate or extent of the immune response, the immunological reaction of an organism to an immunogenic stimulus.
CD.N.7	170	163	10	1.84882927226436e-11	2.300868029333e-07	18	0.110429447852761	0.310344827586207	58	GO:0002429	BP	immune response-activating cell surface receptor signaling pathway	A series of molecular signals initiated by the binding of an extracellular ligand to a receptor on the surface of a cell capable of activating or perpetuating an immune response.
CD.N.8	119	118	1	3.28531392288199e-05	0.408857317702663	3	0.0254237288135593	1	3	GO:0030836	BP	positive regulation of actin filament depolymerization	Any process that activates or increases the frequency, rate or extent of actin depolymerization.
CD.N.8	119	118	2	0.000185614092463232	1	8	0.0677966101694915	0.156862745098039	51	GO:0051493	BP	regulation of cytoskeleton organization	Any process that modulates the frequency, rate or extent of the formation, arrangement of constituent parts, or disassembly of cytoskeletal structures.
CD.N.8	119	118	3	0.000186761953685031	1	4	0.0338983050847458	0.4	10	GO:0030042	BP	actin filament depolymerization	Disassembly of actin filaments by the removal of actin monomers from a filament.
CD.N.8	119	118	4	0.000313203082916196	1	3	0.0254237288135593	0.6	5	GO:0043243	BP	positive regulation of protein complex disassembly	Any process that activates or increases the frequency, rate or extent of protein complex disassembly, the disaggregation of a protein complex into its constituent components.
CD.N.8	119	118	5	0.000339044610705857	1	5	0.0423728813559322	0.25	20	GO:0008064	BP	regulation of actin polymerization or depolymerization	Any process that modulates the frequency, rate or extent of the assembly or disassembly of actin filaments by the addition or removal of actin monomers from a filament.
CD.N.8	119	118	6	0.000339044610705857	1	5	0.0423728813559322	0.25	20	GO:0030183	BP	B cell differentiation	The process in which a precursor cell type acquires the specialized features of a B cell. A B cell is a lymphocyte of B lineage with the phenotype CD19-positive and capable of B cell mediated immunity.
CD.N.8	119	118	7	0.000339044610705857	1	5	0.0423728813559322	0.25	20	GO:0030832	BP	regulation of actin filament length	Any process that controls the length of actin filaments in a cell.
CD.N.8	119	118	8	0.000589669714090921	1	4	0.0338983050847458	0.307692307692308	13	GO:0043244	BP	regulation of protein complex disassembly	Any process that modulates the frequency, rate or extent of protein complex disassembly, the disaggregation of a protein complex into its constituent components.
CD.N.8	119	118	9	0.00103430745227285	1	2	0.0169491525423729	1	2	GO:0050779	BP	RNA destabilization	Any process that decreases the stability of an RNA molecule, making it more vulnerable to degradative processes.
CD.N.8	119	118	10	0.00103430745227285	1	2	0.0169491525423729	1	2	GO:0031143	CC	pseudopodium	A temporary protrusion or retractile process of a cell, associated with flowing movements of the protoplasm, and serving for locomotion and feeding.
CD.N.9	118	115	1	9.47357124628905e-11	1.17898594160067e-06	9	0.0782608695652174	0.6	15	GO:0002504	BP	antigen processing and presentation of peptide or polysaccharide antigen via MHC class II	The process in which an antigen-presenting cell expresses antigen (peptide or polysaccharide) on its cell surface in association with an MHC class II protein complex.
CD.N.9	118	115	2	6.68608303896301e-09	8.32083034198946e-05	32	0.278260869565217	0.0932944606413994	343	GO:0006952	BP	defense response	Reactions, triggered in response to the presence of a foreign body or the occurrence of an injury, which result in restriction of damage to the organism attacked or prevention/recovery from the infection caused by the attack.
CD.N.9	118	115	3	7.58715087559159e-09	9.44220926467373e-05	7	0.0608695652173913	0.636363636363636	11	GO:0042613	CC	MHC class II protein complex	A transmembrane protein complex composed of an MHC class II alpha and MHC class II beta chain, and with or without a bound peptide or polysaccharide antigen.
CD.N.9	118	115	4	3.17775731768428e-08	0.000395471898185808	40	0.347826086956522	0.0749063670411985	534	GO:0002376	BP	immune system process	Any process involved in the development or functioning of the immune system, an organismal system for calibrated responses to potential internal or invasive threats.
CD.N.9	118	115	5	4.63294950290839e-08	0.00057657056563695	40	0.347826086956522	0.0739371534195934	541	GO:0044459	CC	plasma membrane part	Any constituent part of the plasma membrane, the membrane surrounding a cell that separates the cell from its external environment. It consists of a phospholipid bilayer and associated proteins.
CD.N.9	118	115	6	9.61284670422535e-08	0.00119631877234084	31	0.269565217391304	0.0856353591160221	362	GO:0006955	BP	immune response	Any immune system process that functions in the calibrated response of an organism to a potential internal or invasive threat.
CD.N.9	118	115	7	1.65832788686488e-07	0.00206378905520334	5	0.0434782608695652	0.833333333333333	6	GO:0019886	BP	antigen processing and presentation of exogenous peptide antigen via MHC class II	The process in which an antigen-presenting cell expresses a peptide antigen of exogenous origin on its cell surface in association with an MHC class II protein complex. The peptide antigen is typically, but not always, processed from a whole protein.
CD.N.9	118	115	8	1.6767671494125e-07	0.00208673671744386	65	0.565217391304348	0.0534539473684211	1216	GO:0031224	CC	intrinsic to membrane	Located in a membrane such that some covalently attached portion of the gene product, for example part of a peptide sequence or some other covalently attached group such as a GPI anchor, spans or is embedded in one or both leaflets of the membrane.
CD.N.9	118	115	9	2.62084541722882e-07	0.00326164212174127	64	0.556521739130435	0.0533333333333333	1200	GO:0016021	CC	integral to membrane	Penetrating at least one phospholipid bilayer of a membrane. May also refer to the state of being buried in the bilayer with no exposure outside the bilayer. When used to describe a protein, indicates that all or part of the peptide sequence is embedded in the membrane.
CD.N.9	118	115	10	5.45940168004626e-07	0.00679422539081757	28	0.243478260869565	0.0851063829787234	329	GO:0005887	CC	integral to plasma membrane	Penetrating at least one phospholipid bilayer of a plasma membrane. May also refer to the state of being buried in the bilayer with no exposure outside the bilayer.
